# Supplementary material for: Clinical Behavior and Molecular Landscape of Stage I p53-Abnormal Low-Grade Endometrioid Endometrial Carcinomas
Source: PubMed Central journal article supplement — Clin Cancer Res. 2023 Sep 29;29(23):4949–57. doi: 10.1158/1078-0432.CCR-23-1397 (PMC10690141; doi:10.1158/1078-0432.ccr-23-1397), 2023-09-29

## Supplementary Figure S1. Representative relative copy number plots

- I. Two examples of cases without any copy number alterations. On the left, a NSMP low-grade EEC control that passed the quality check. On the right, a case diagnosed as low-grade EEC by  $\geq 3$  pathologists with sufficient DNA quality but a *TP53* VAF of 16% and was, therefore, considered ineligible for reliable copy number assessment.

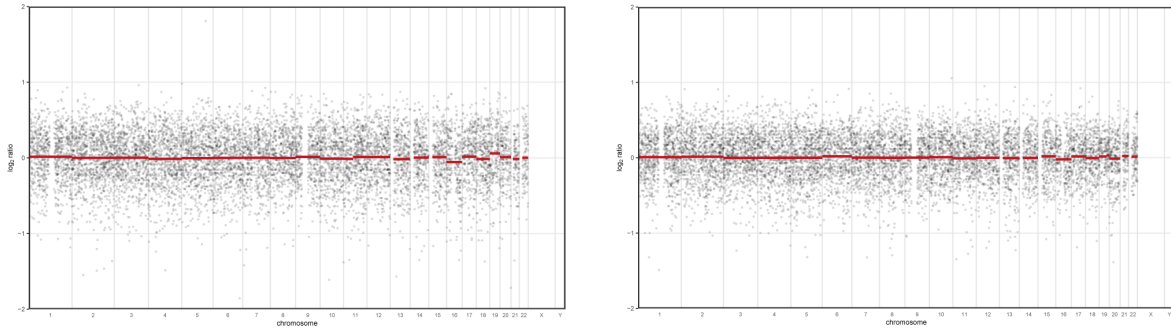

- II. Two NSMP EEC reference cases with  $< 5$  somatic copy number alterations. Note the presence of few copy number alterations with segments that cover the entire chromosome or whole chromosome arm.

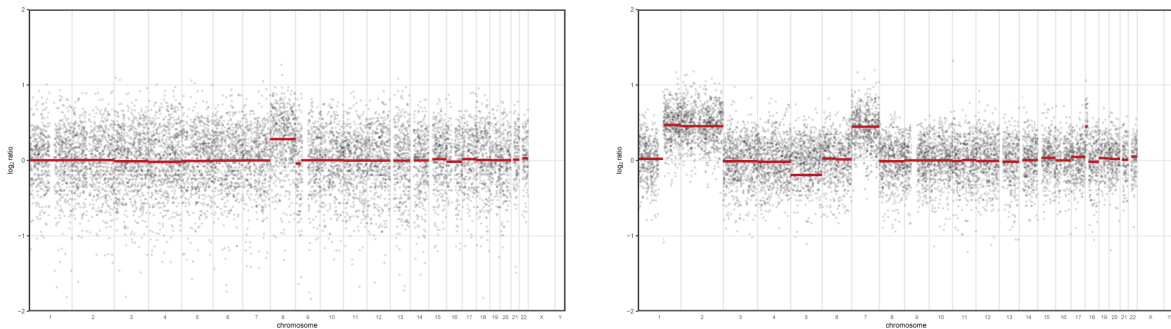

- III. Two EC with  $> 10$  somatic copy number alterations. On the left, a case diagnosed as low-grade EEC by  $\geq 3$  pathologists. On the right, a p53abn serous EC reference case.

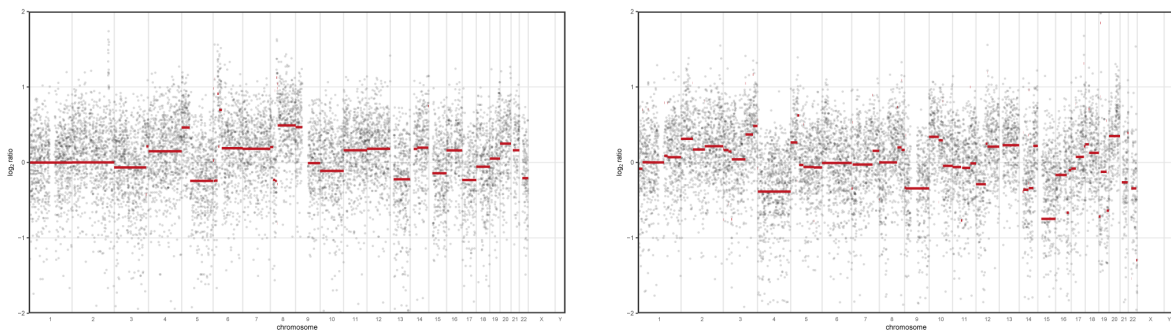

Supplement: ccr-23-1397_supplementary_figure_s1_suppfs1.pdf [file ccr-23-1397_supplementary_figure_s1_suppfs1.pdf]
