# Supplementary material for: Clinical Behavior and Molecular Landscape of Stage I p53-Abnormal Low-Grade Endometrioid Endometrial Carcinomas
Source: PubMed Central journal article supplement — Clin Cancer Res. 2023 Sep 29;29(23):4949–57. doi: 10.1158/1078-0432.CCR-23-1397 (PMC10690141; doi:10.1158/1078-0432.ccr-23-1397), 2023-09-29

**Supplementary Figure S2. Representative examples of cases diagnosed as low-grade EEC by  $\leq 1$  pathologists.**

Hematoxylin and eosin (H&E) slides of four cases diagnosed as low-grade endometrioid by one or less of the expert pathologists upon blinded pathology review.

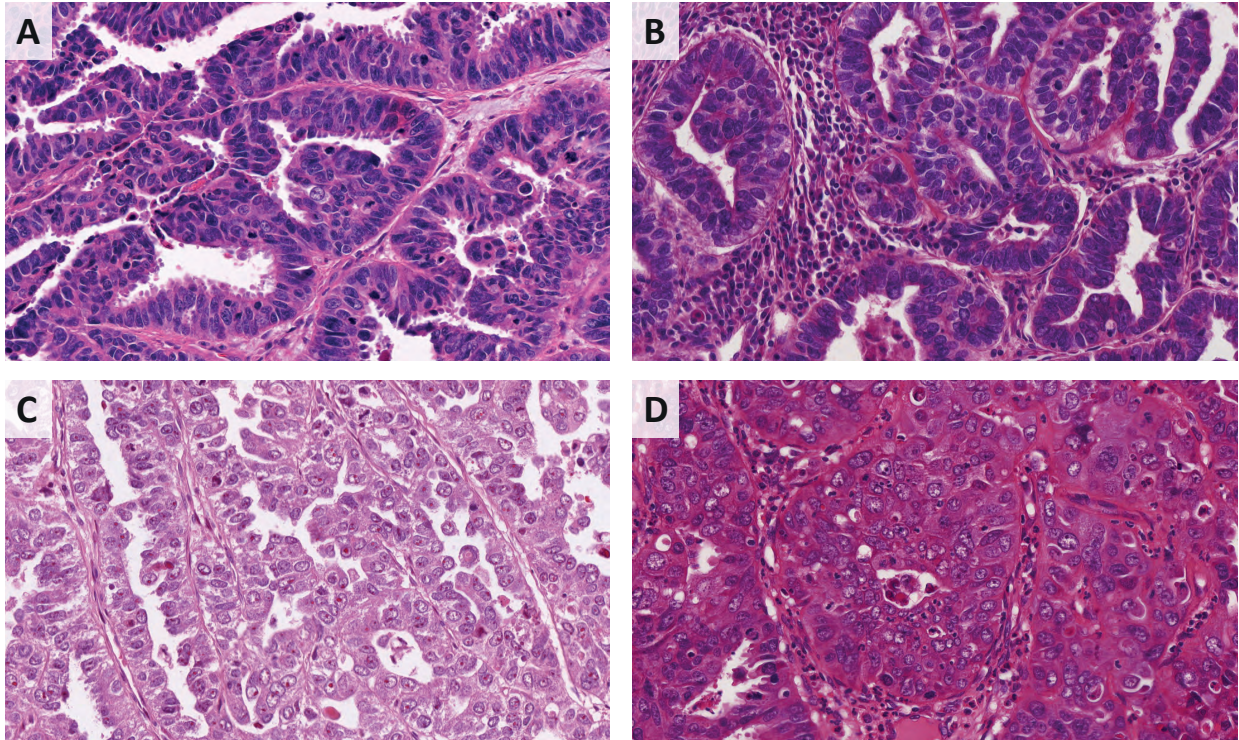

Supplement: ccr-23-1397_supplementary_figure_s2_suppfs2.pdf [file ccr-23-1397_supplementary_figure_s2_suppfs2.pdf]
