# Supplementary material for: Clinical Behavior and Molecular Landscape of Stage I p53-Abnormal Low-Grade Endometrioid Endometrial Carcinomas
Source: PubMed Central journal article supplement — Clin Cancer Res. 2023 Sep 29;29(23):4949–57. doi: 10.1158/1078-0432.CCR-23-1397 (PMC10690141; doi:10.1158/1078-0432.ccr-23-1397), 2023-09-29

### Supplementary Figure S3. Predicted DNA ploidy.

Violin plot illustrating the predicted DNA ploidy of a subset of p53-abnormal low-grade endometrioid endometrial carcinomas (EEC), p53-abnormal serous endometrial carcinomas (EC) and NSMP low-grade EEC. DNA ploidy could be in 53.3% (n=24/45) of the cases and in 42.9% (n=9/21) of the reference set with successful shallow whole genome sequencing-based copy number plots.

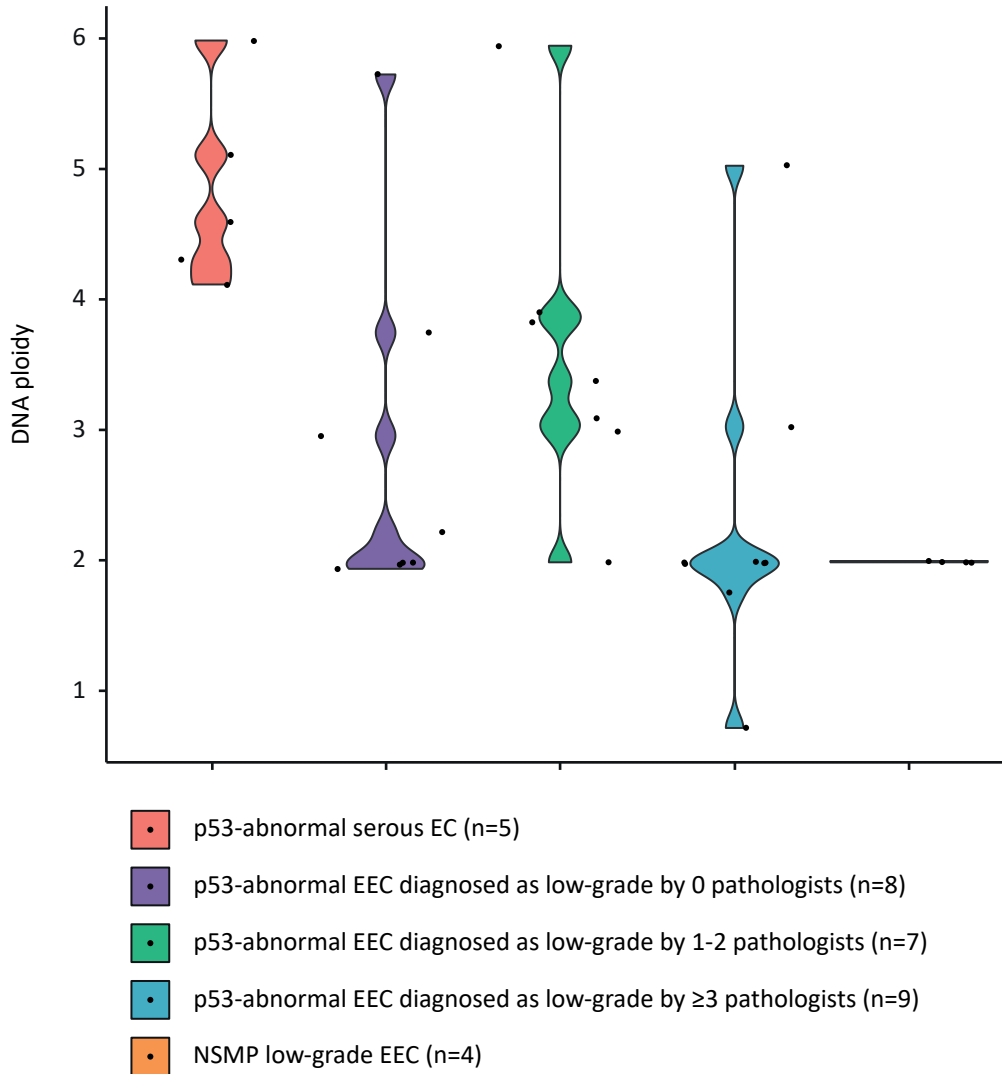

Supplement: ccr-23-1397_supplementary_figure_s3_suppfs3.pdf [file ccr-23-1397_supplementary_figure_s3_suppfs3.pdf]
