# Supplementary material for: Clinical Behavior and Molecular Landscape of Stage I p53-Abnormal Low-Grade Endometrioid Endometrial Carcinomas
Source: PubMed Central journal article supplement — Clin Cancer Res. 2023 Sep 29;29(23):4949–57. doi: 10.1158/1078-0432.CCR-23-1397 (PMC10690141; doi:10.1158/1078-0432.ccr-23-1397), 2023-09-29

**Supplementary Figure S4. H&E, immunohistochemistry stains and relative copy number plot of a case diagnosed as low-grade EEC by  $\geq 3$  pathologists.**

The case showed endometrioid-type morphological features on H&E including glandular architecture (A, 10x magnification) and smooth luminal borders with mild nuclear atypia (B, 20x magnification). Immunohistochemistry (IHC) showed mutant-type p53-expression (C), weak patchy p16 staining (D), ER and PR positivity (E and F), absence of L1CAM expression with positive internal control (G); all IHC images taken at 20x magnification. The relative copy number plot (H) showed  $>10$  somatic copy number alterations.

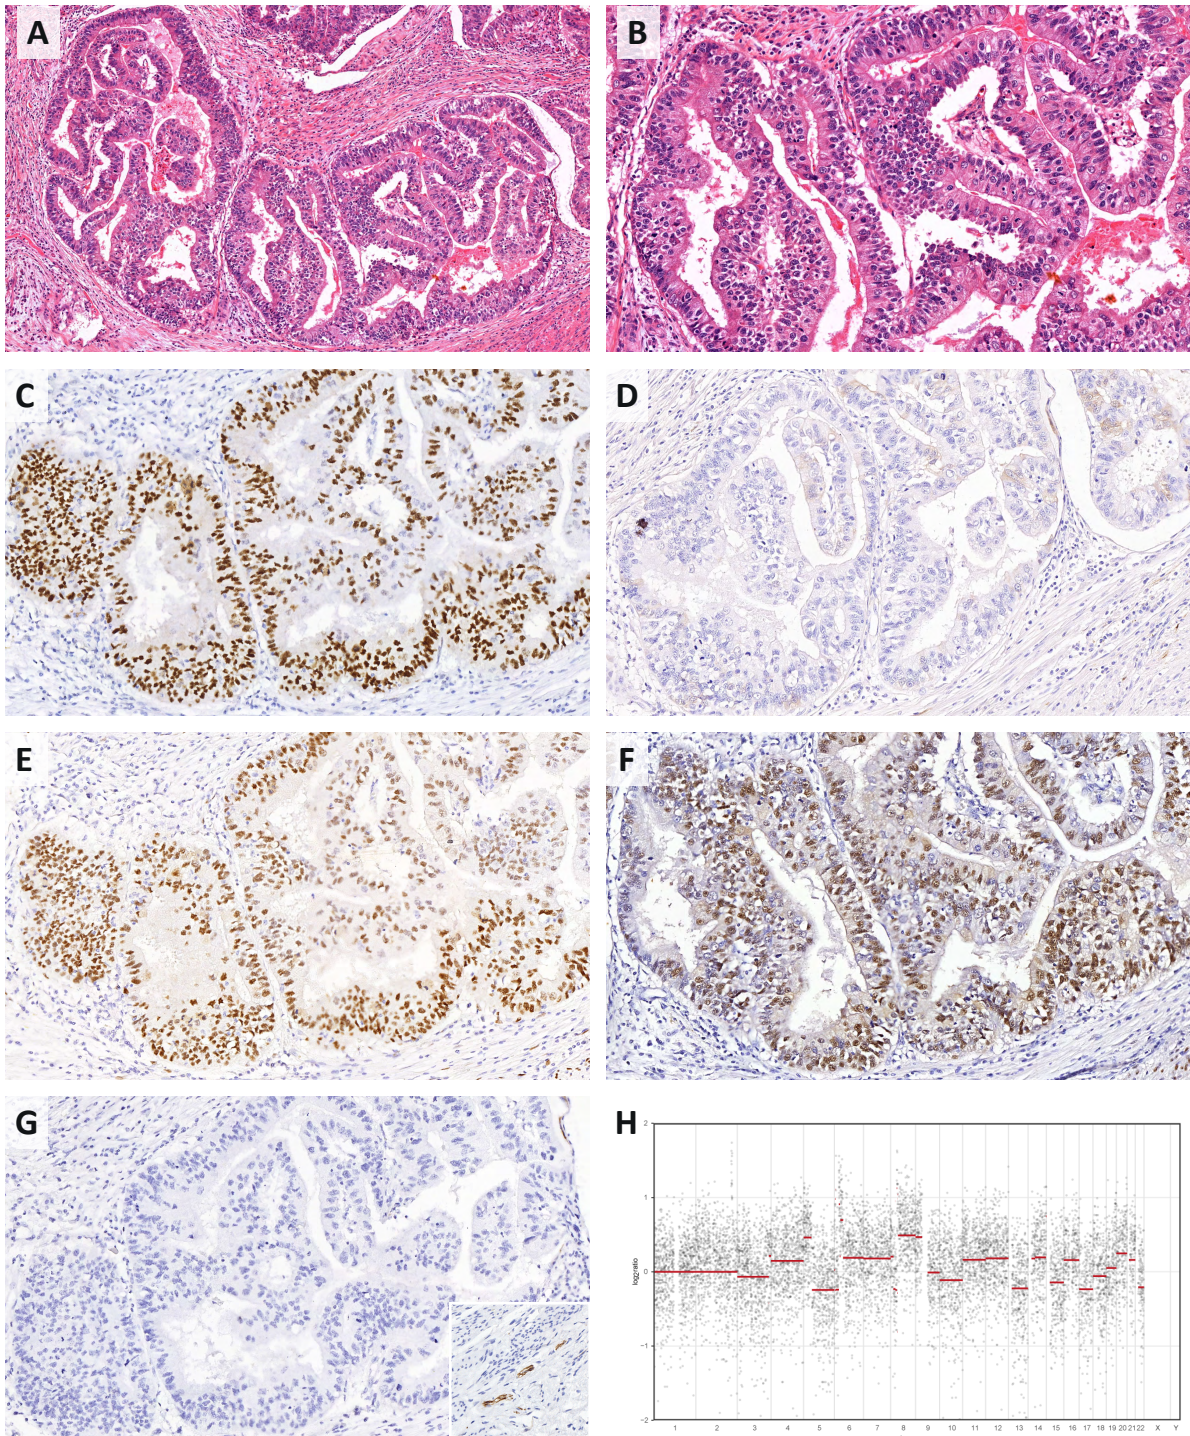

Supplement: ccr-23-1397_supplementary_figure_s4_suppfs4.pdf [file ccr-23-1397_supplementary_figure_s4_suppfs4.pdf]
