# Supplementary material for: Clinical Behavior and Molecular Landscape of Stage I p53-Abnormal Low-Grade Endometrioid Endometrial Carcinomas
Source: PubMed Central journal article supplement — Clin Cancer Res. 2023 Sep 29;29(23):4949–57. doi: 10.1158/1078-0432.CCR-23-1397 (PMC10690141; doi:10.1158/1078-0432.ccr-23-1397), 2023-09-29

**Supplementary Figure S5. Recurrence-free survival by agreement on low-grade endometrioid morphology.** Kaplan-Meier curves for the 5-year recurrence free survival of stage I p53-abnormal endometrial carcinomas by the level of agreement on low-grade endometrioid histotype after blinded pathology review by six expert gynecologic pathologists.

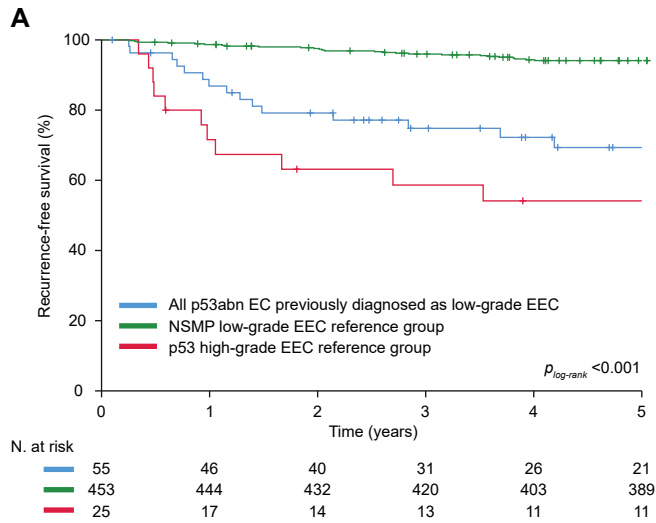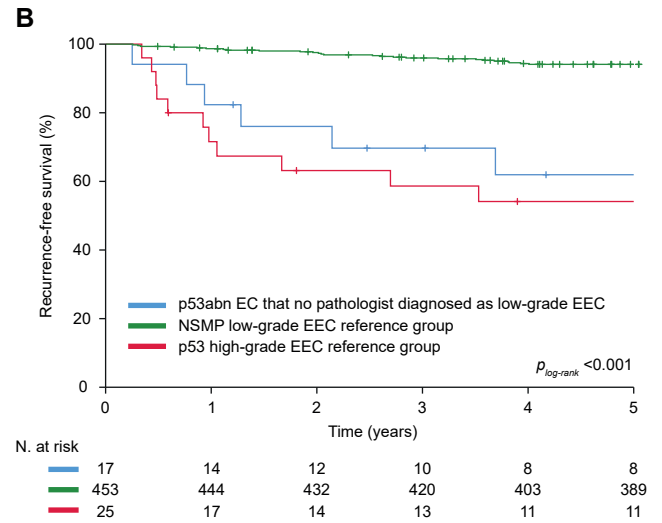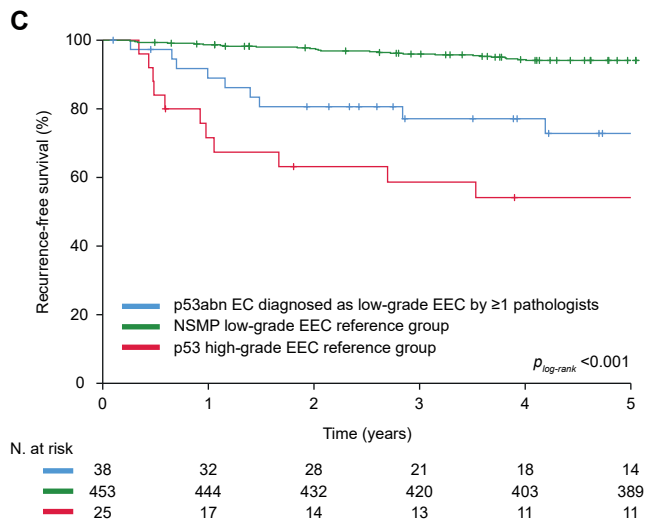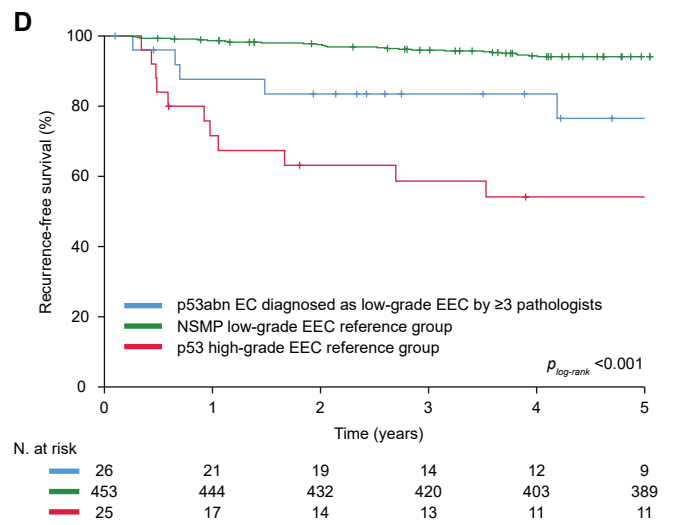

Supplement: ccr-23-1397_supplementary_figure_s5_suppfs5.pdf [file ccr-23-1397_supplementary_figure_s5_suppfs5.pdf]
